# Supplementary material for: Generation and Characterisation of a Reference Transcriptome for Lentil (Lens culinaris Medik.)
Source: MDPI journal article supplement (doi:10.3390/ijms17111887), 2016-11-12
Supplement: s1 [file s1]

# Supplementary Materials: Generation and Characterisation of a Reference Transcriptome for Lentil (*Lens culinaris* Medik.)

Shimna Sudheesh, Preeti Verma, John W. Forster, Noel O. I. Cogan and Sukhjiwan Kaur

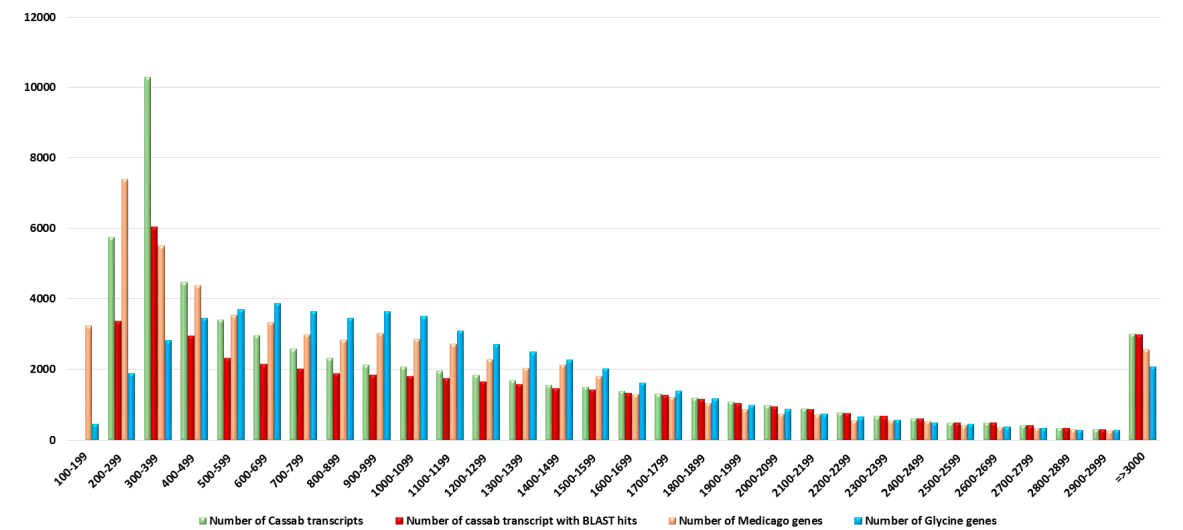

**Figure S1.** Length distribution of transcripts/genes—Cassab reference transcripts, Cassab reference transcripts with Nr BLAST hits, Medicago genes and Glycine genes.

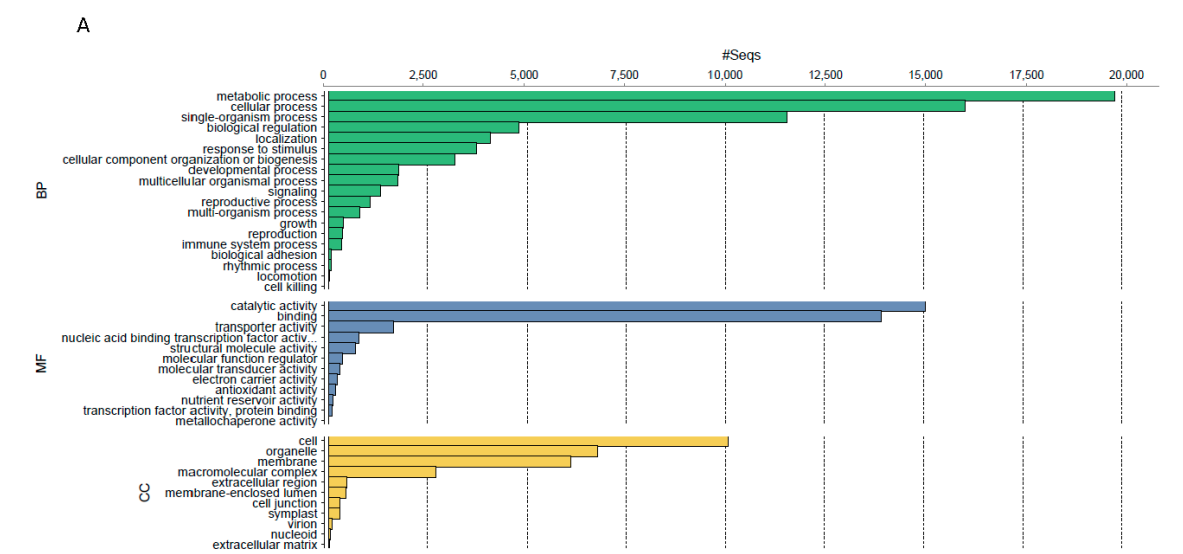

**Figure S2.** Cont.

B

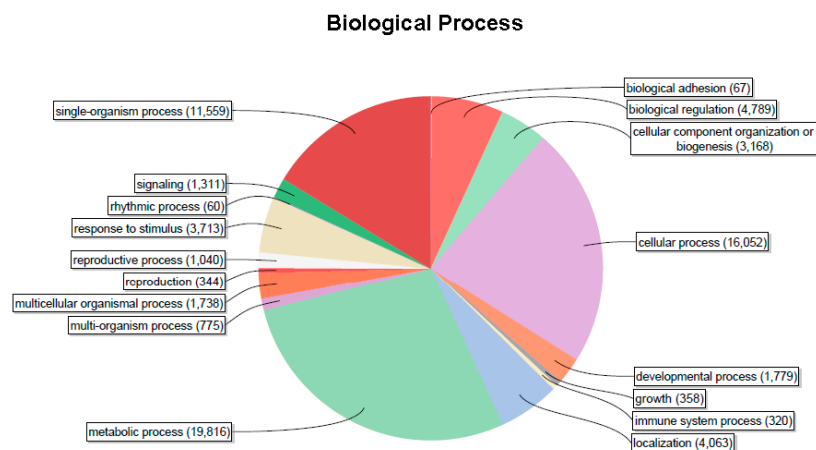

C

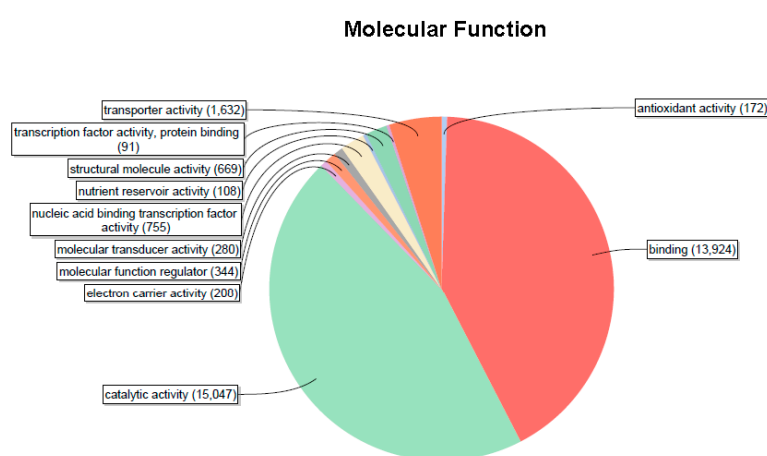

D

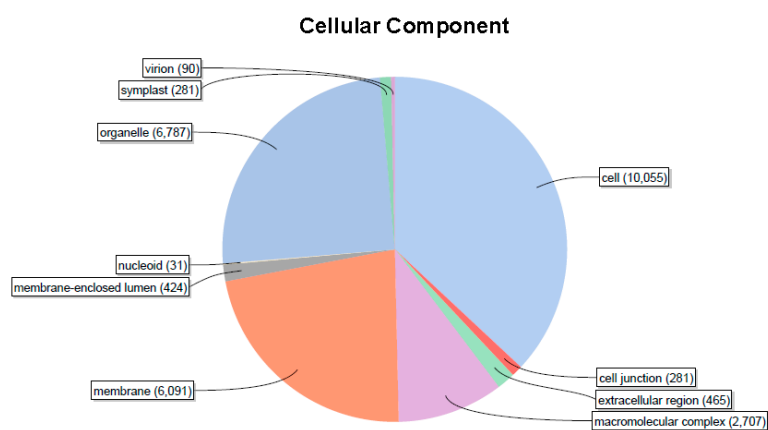

**Figure S2.** (A) Distribution of the annotated transcripts under gene ontology categories such as biological process (BP), molecular function (MF) and cellular component (CC); (B) Distribution of the annotated transcripts under gene ontology category–biological process (BP); (C) Distribution of the annotated transcripts under gene ontology category–molecular function (MF); (D) Distribution of the annotated transcripts under gene ontology category–cellular component (CC).
